# Supplementary material for: A Holocene history of climate, fire, landscape evolution, and human activity in Northeast Iceland
Source: Copernicus journal article supplement (doi:10.5194/cp-2023-74), 2023-10-27

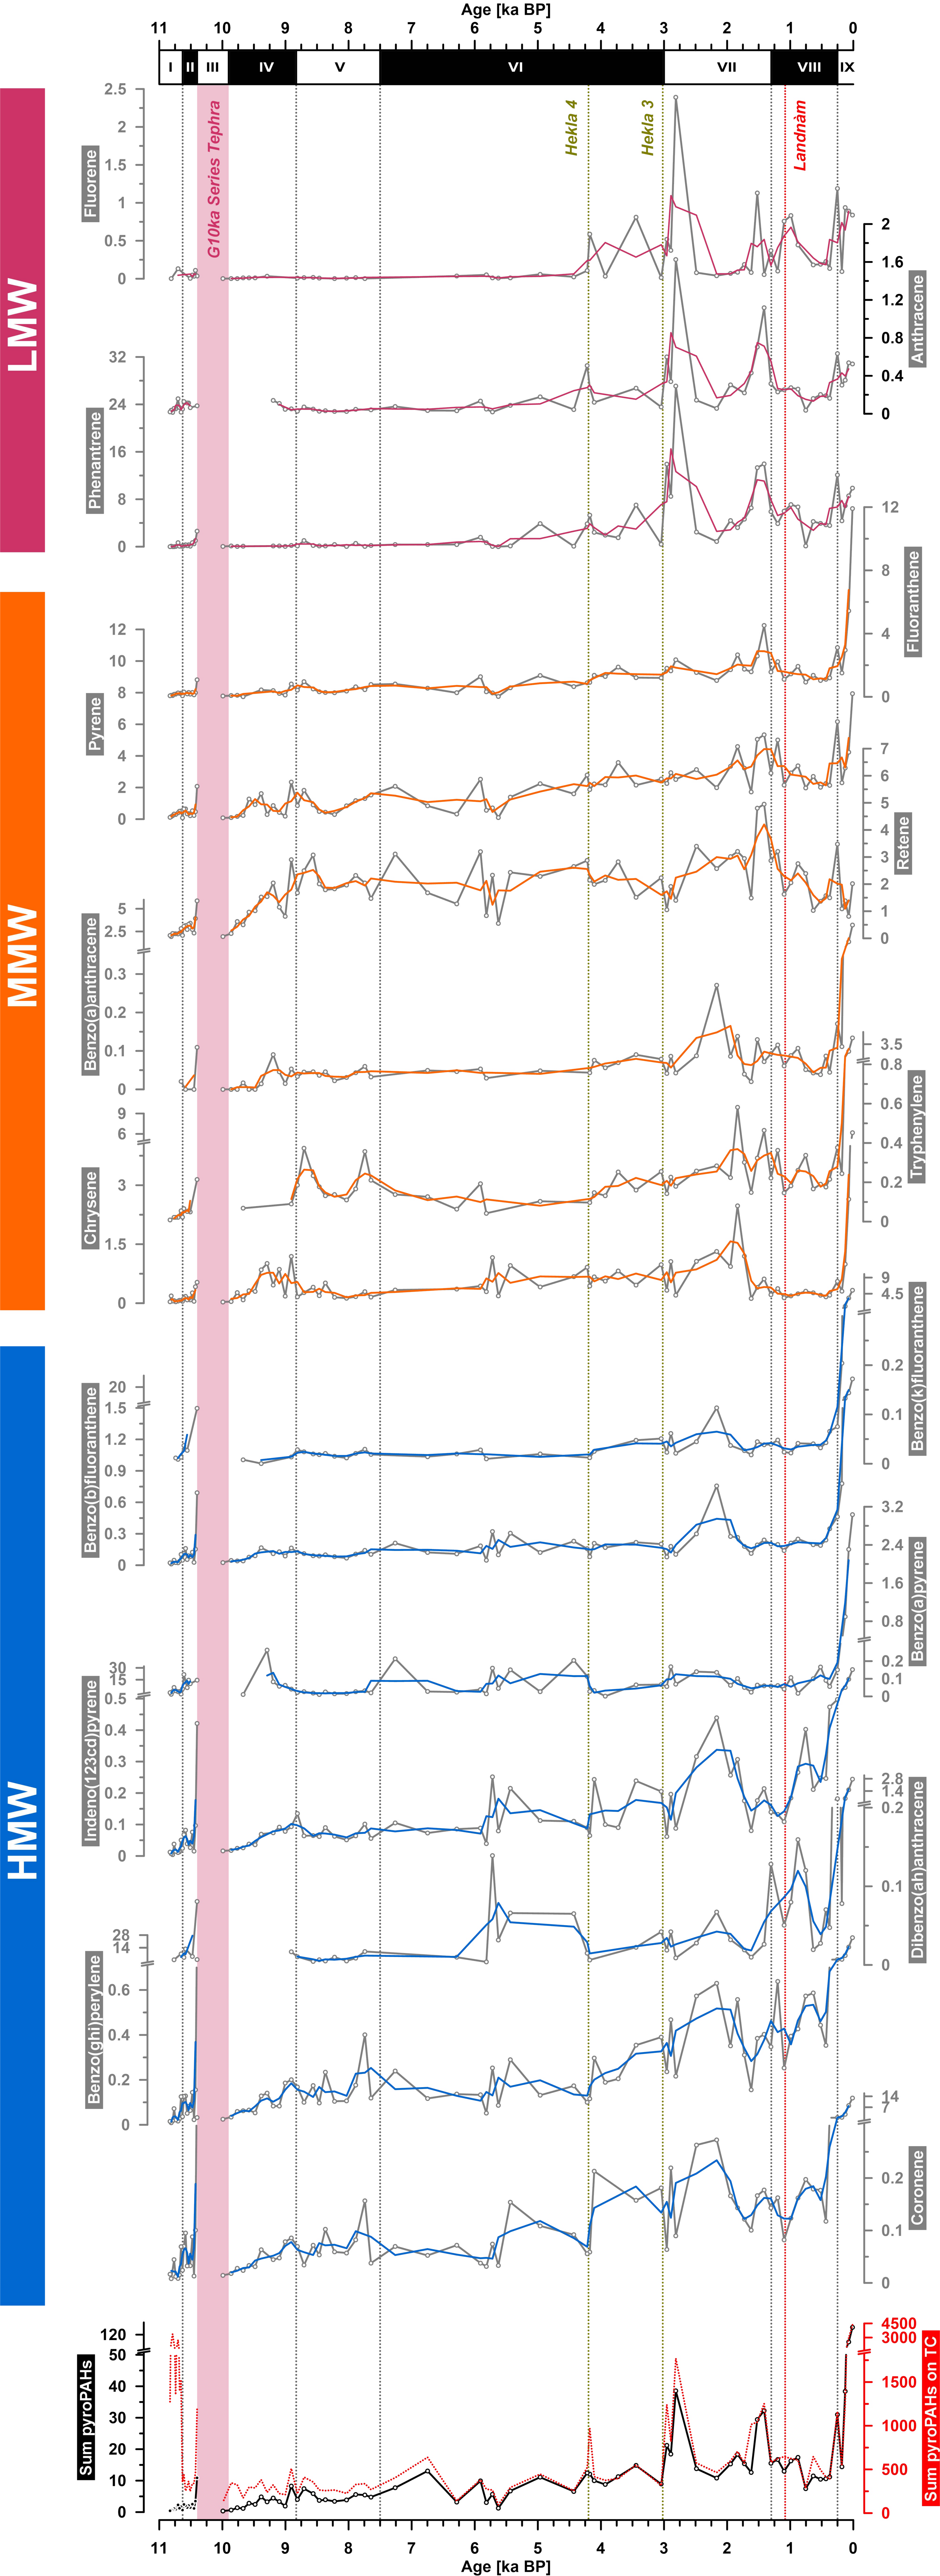

Supplement: Supplementary file [file cp-2023-74-AC1-supplement.pdf]
